# Supplementary material for: Experimental evidence and network pharmacology-based analysis reveal the molecular mechanism of Tongxinluo capsule administered in coronary heart diseases
Source: PubMed Central journal article supplement (PMC7560518; doi:10.1042/bsr20201349), 2020-10-13
Supplement: BSR-2020-1349_supp.pdf [file BSR-2020-1349_supp.pdf]

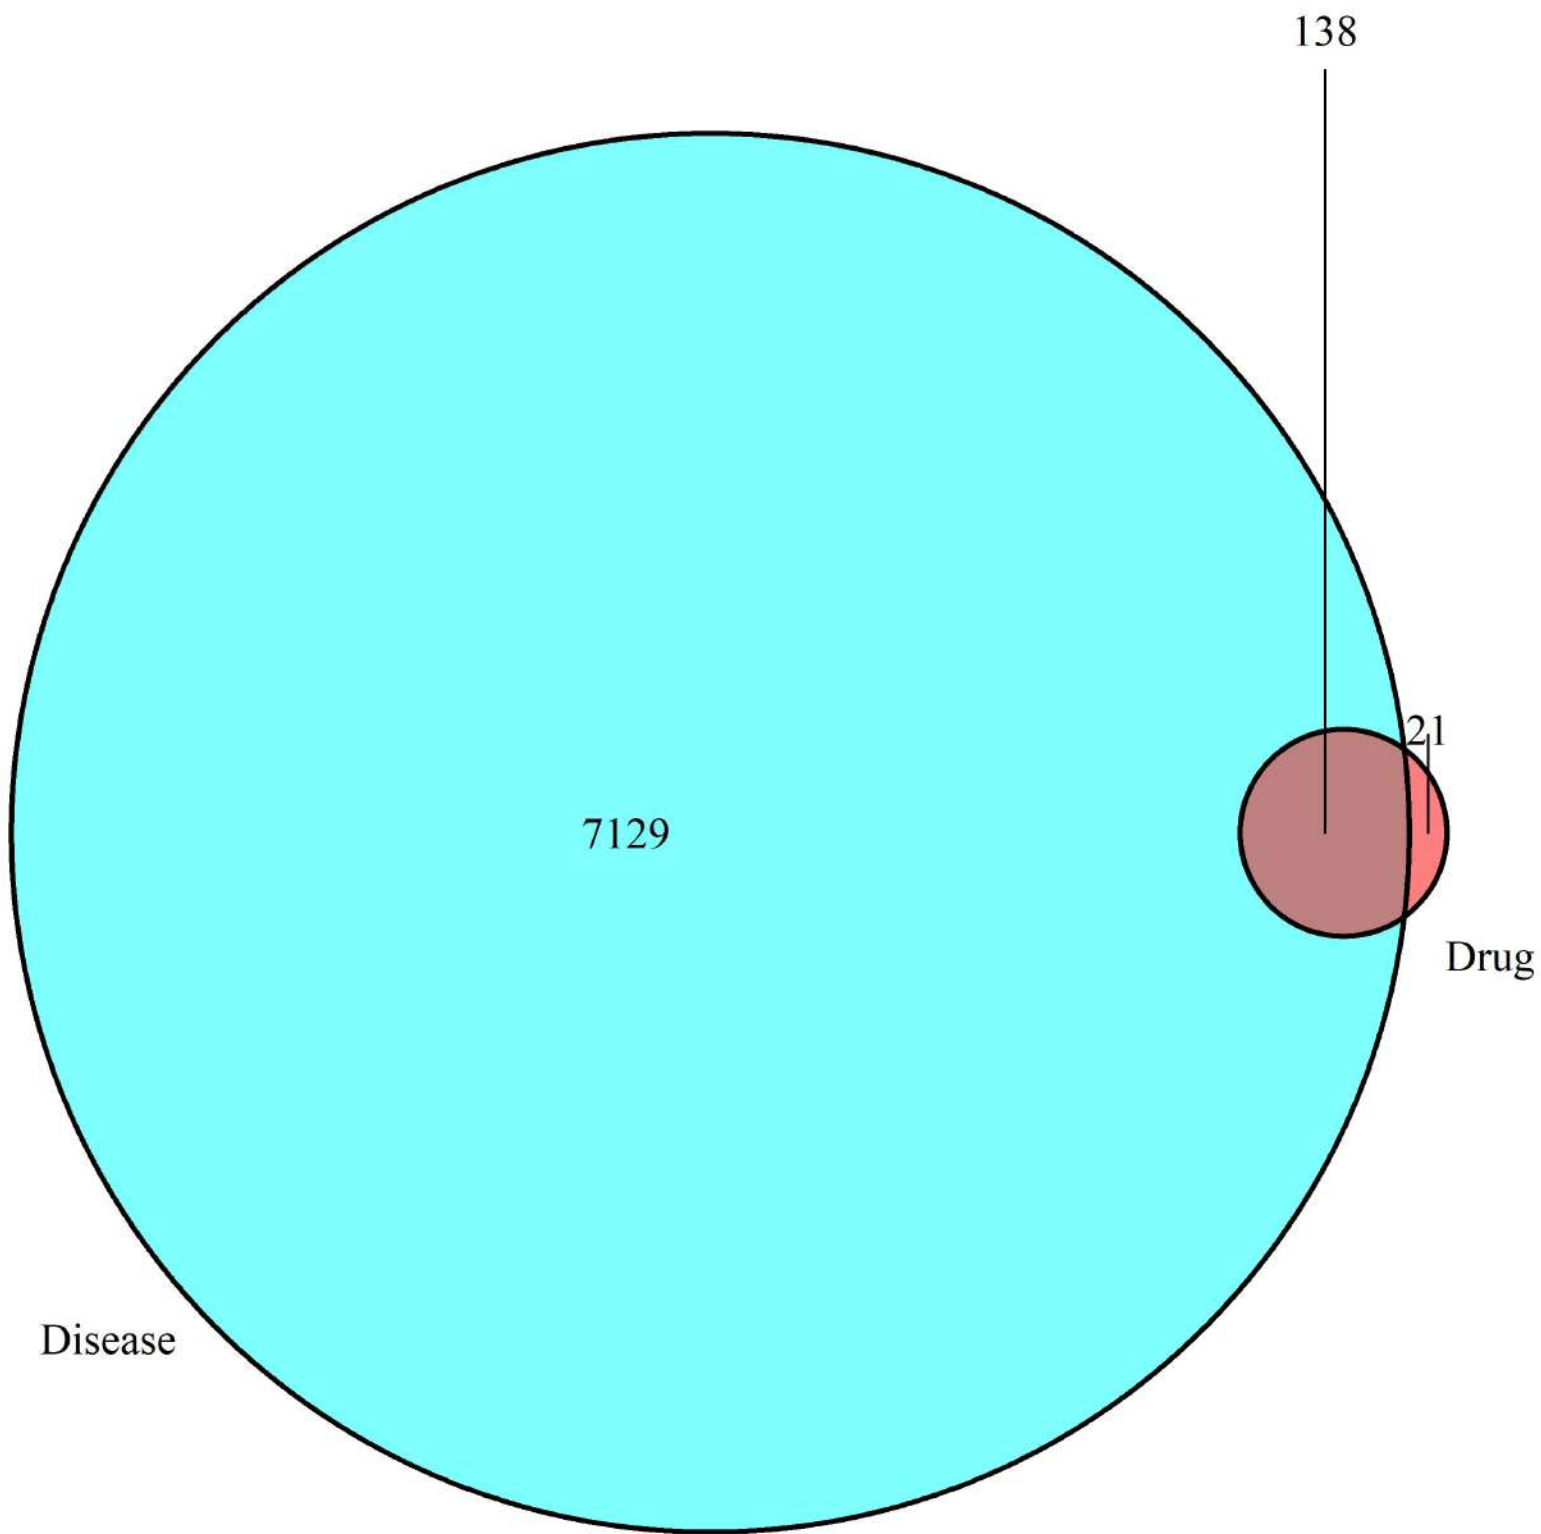

**Figure S1.** Venn diagram showing the overlapped genes between TXL and CHD.

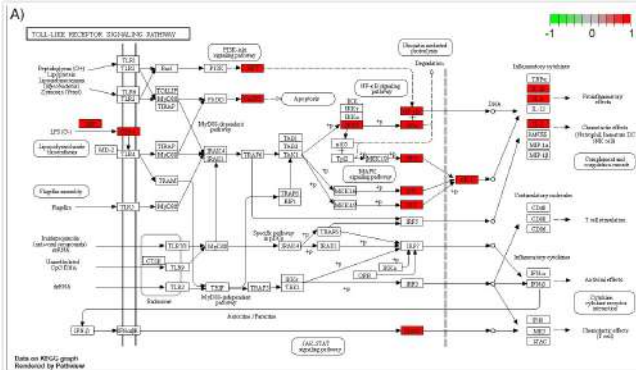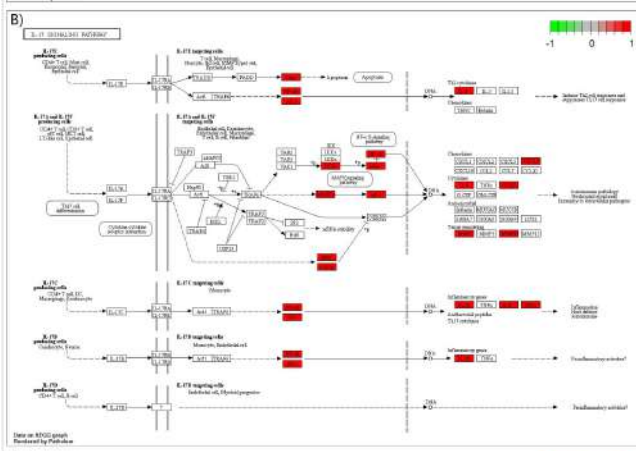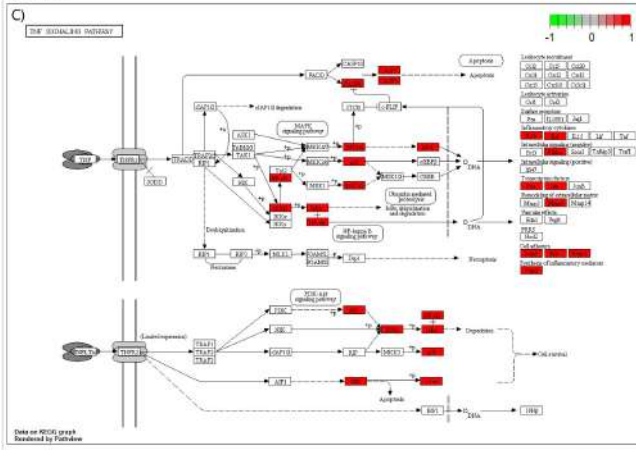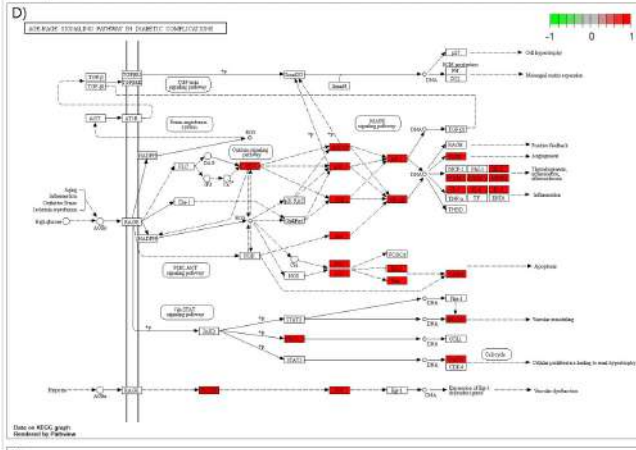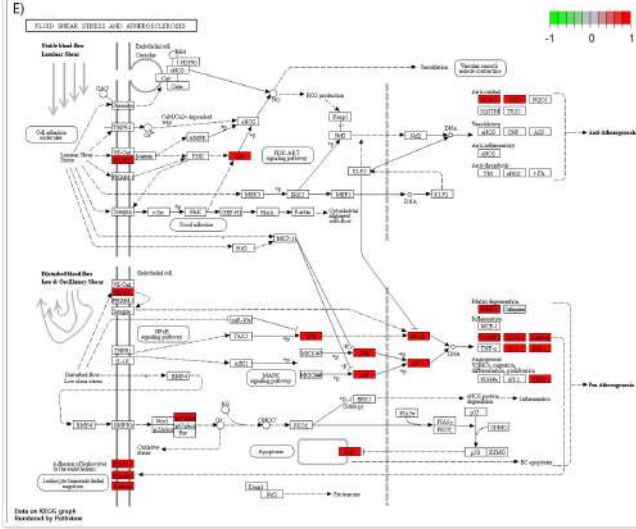

**Figure S2.** Pathviews of involved pathways. A) Pathviews of Toll-like receptor signaling pathway. B) Pathviews of IL-17 signaling pathway. C) Pathviews of TNF signaling pathway. D) Pathviews of AGE-RAGE signaling pathway. E) Pathviews of Fluid shear stress and Atherosclerosis.
